# Supplementary material for: Extracting recent short-term glacier velocity evolution over southern Alaska and the Yukon from a large collection of Landsat data
Source: Copernicus journal article supplement (doi:10.5194/tc-13-795-2019), 2019-03-05
Supplement: Supplementary file 1 [file tc-13-795-2019-supplement.zip]

Archive with 2 entries (2 files):
- stEliasV2.mpeg
- tc-13-795-2019-supplement-title-page.pdf
