# Supplementary material for: Extracting recent short-term glacier velocity evolution over southern Alaska and the Yukon from a large collection of Landsat data
Source: Copernicus journal article supplement (doi:10.5194/tc-13-795-2019), 2019-03-05
Supplement: Supplementary file 1 [file tc-13-795-2019-supplement.zip › tc-13-795-2019-supplement-title-page.pdf]

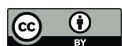

## *Supplement of*

# **Extracting recent short-term glacier velocity evolution over southern Alaska and the Yukon from a large collection of Landsat data**

**Bas Altena et al.**

*Correspondence to:* Bas Altena ([bas.altena@geo.uio.no](mailto:bas.altena@geo.uio.no))

- [tc-13-795-2019-supplement-title-page.pdf](#)
- [stEliasV2.mpeg](#)

The copyright of individual parts of the supplement might differ from the CC BY 4.0 License.
